# Supplementary material
Source: ML conference proceedings conference paper supplement (https://openreview.net/forum?id=TYtYTHTlel)
Supplement: supplementary_material [file attachment]

# Real2Gen: Imitation Learning from a Single Human Demonstration with Generative Foundational Models

Nick Heppert<sup>1, 2\*</sup>, Minh Quang Nguyen<sup>1\*</sup>, Abhinav Valada<sup>1</sup>

<sup>1</sup>University of Freiburg, <sup>2</sup>Zuse School ELIZA, \*equal contribution

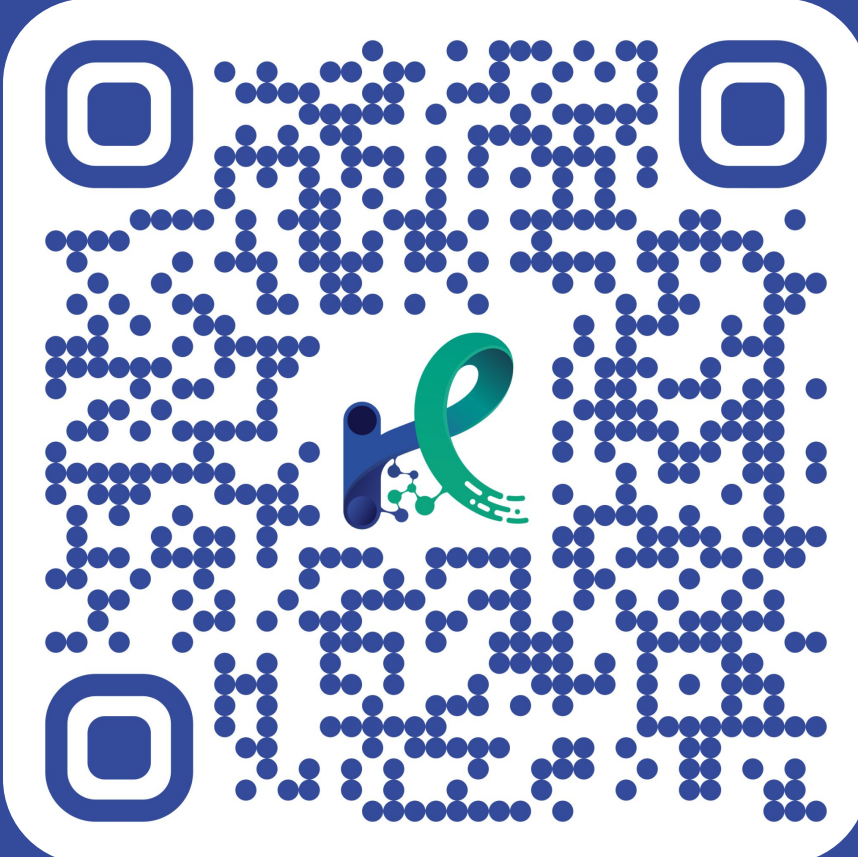

## Motivation

### Single Human Demonstration

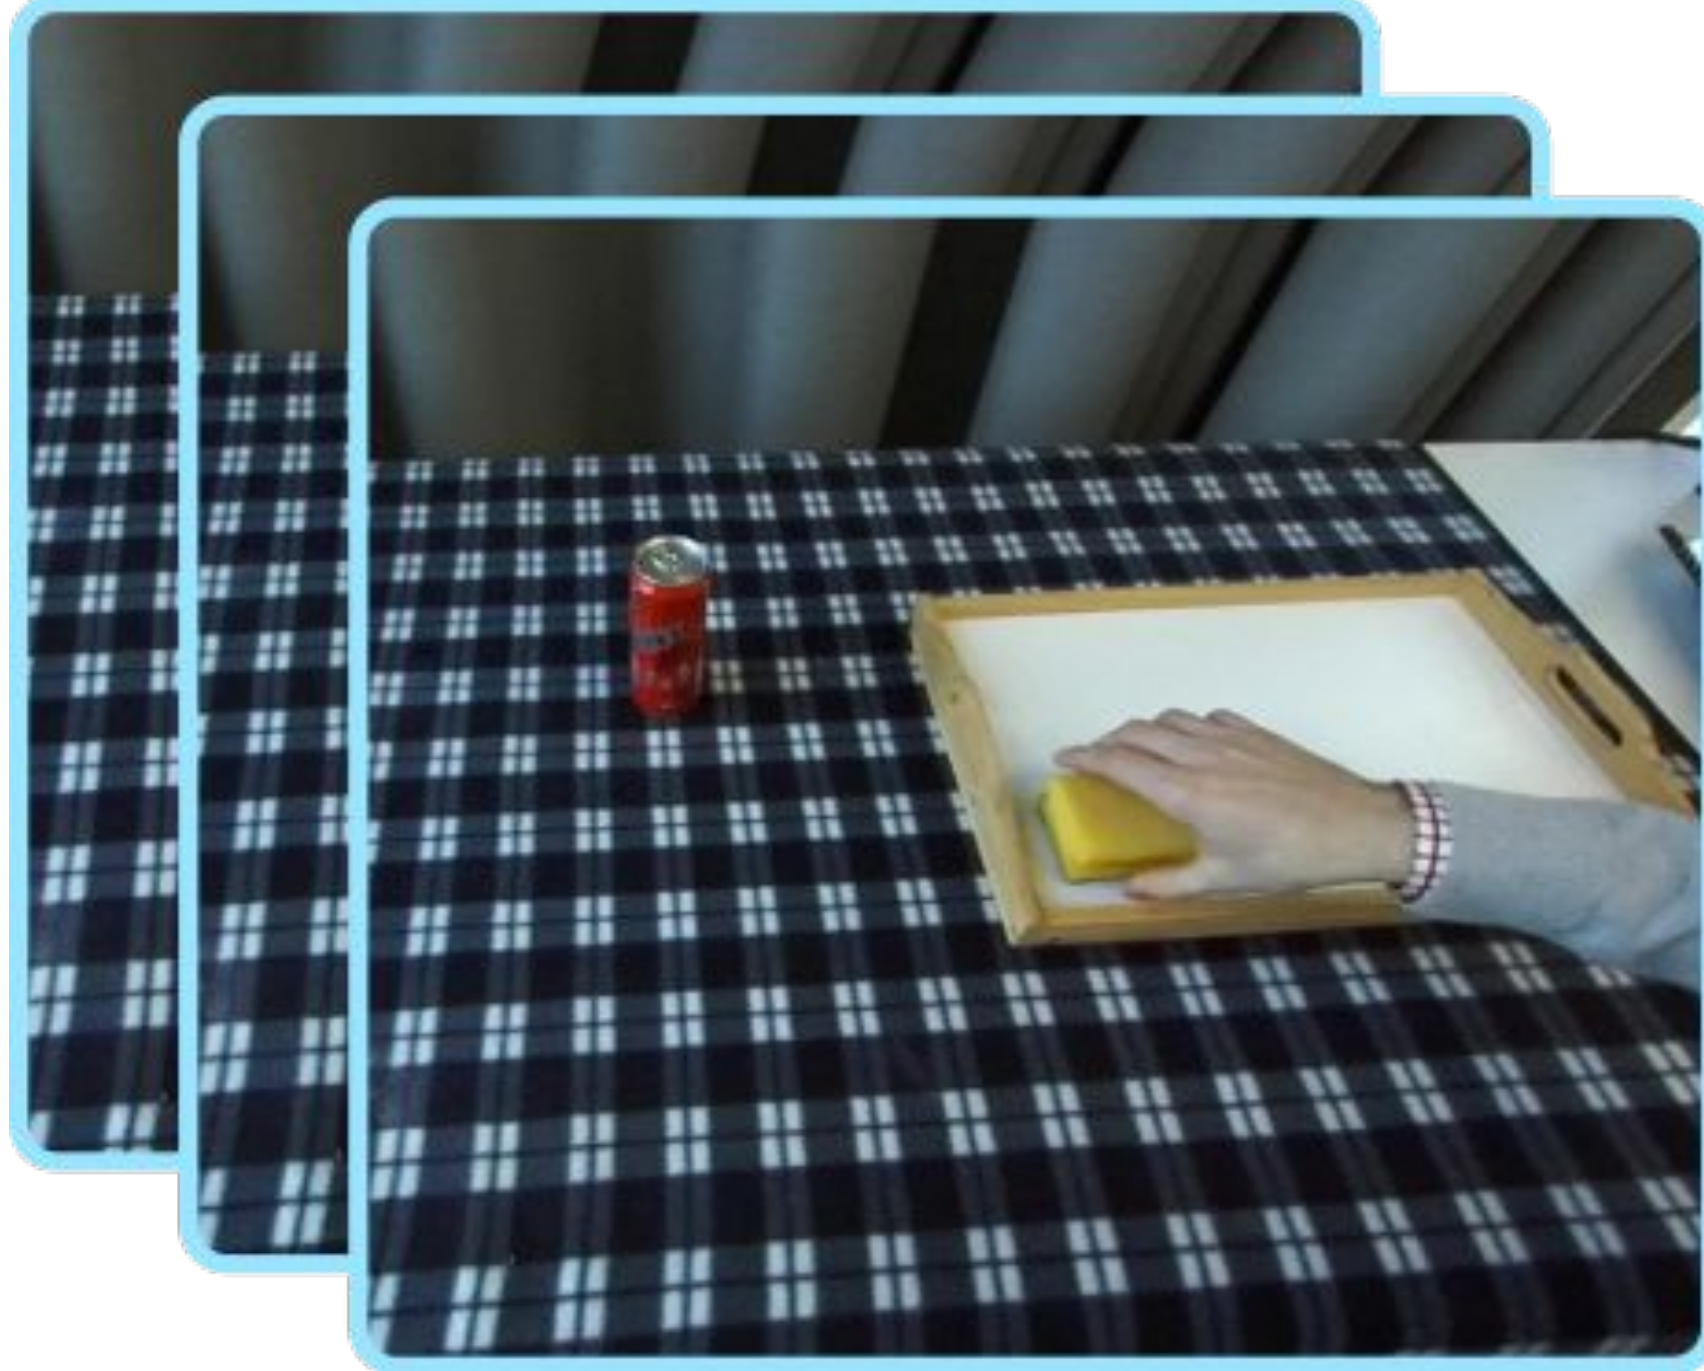

### Generative Simulation

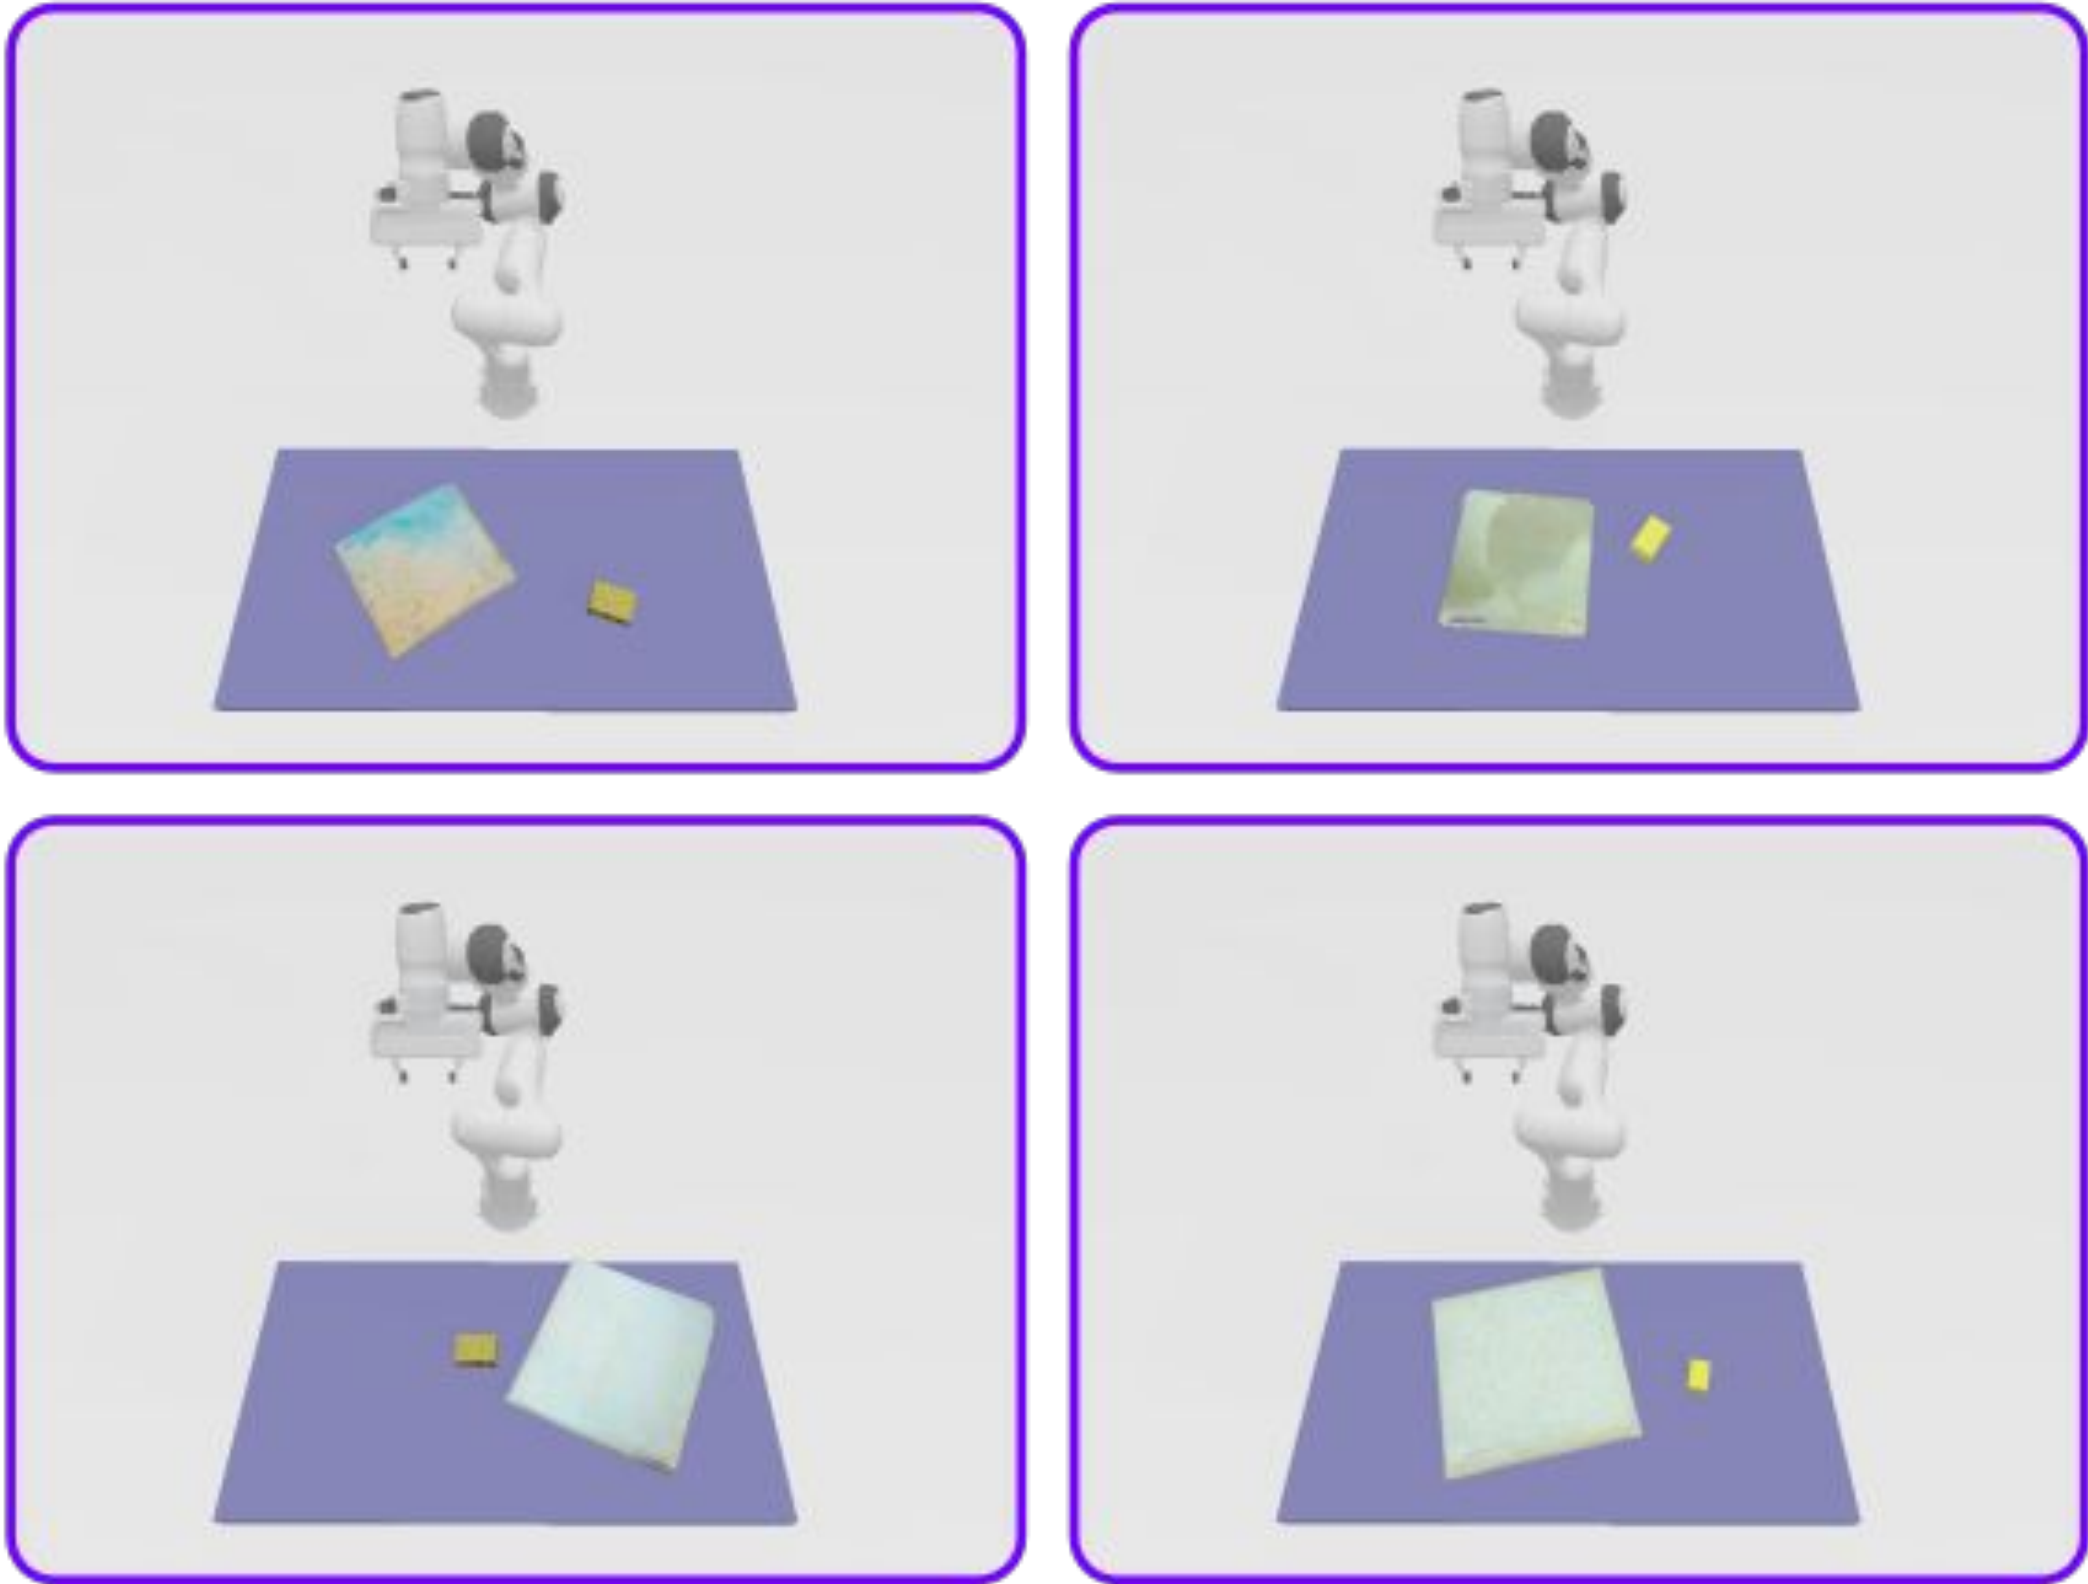

- Imitation learning promising paradigm to learn new tasks
  - Commonly trained on robot demos, but collecting with tele-operation or kinesthetic teaching is tedious
- Real2Gen: Transform human demos to robot demos using generative simulation

## Real2Gen Overview

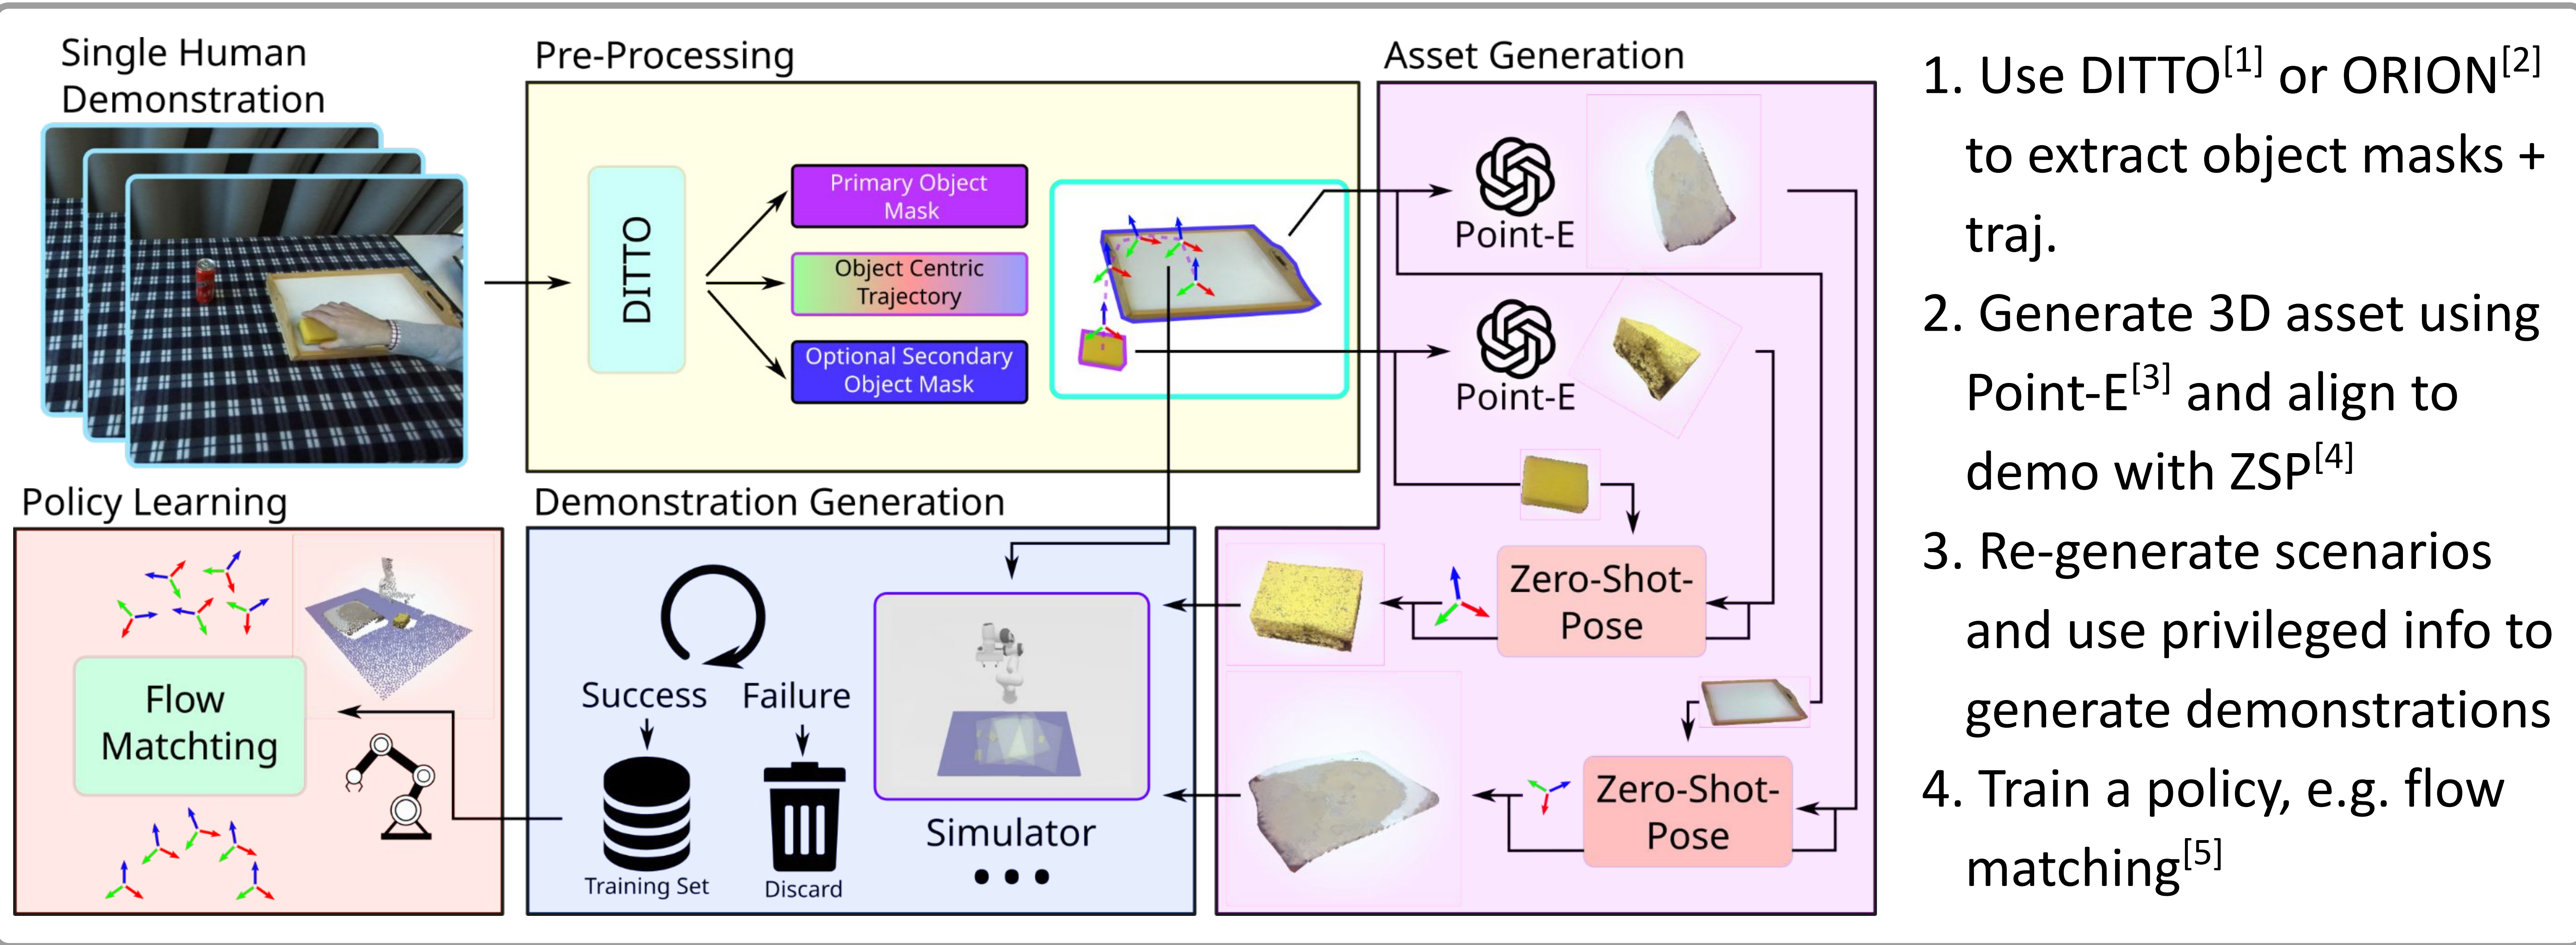

## Experiment – Policy Learning

### Policy Learning Results

| Method                                     | Sponge on Tray [%] (↑) | Coke on Tray [%] (↑) | Paperroll upright [%] (↑) | Mean SR [%] (↑)      |
|--------------------------------------------|------------------------|----------------------|---------------------------|----------------------|
| DITTO <sup>[1]</sup>                       | 6.3 <sup>±2.1</sup>    | 26.0 <sup>±3.6</sup> | 0.3 <sup>±0.5</sup>       | 10.9 <sup>±2.1</sup> |
| DITTO <sup>[1]</sup> w/ ZSP <sup>[4]</sup> | 4.3 <sup>±1.2</sup>    | 19.7 <sup>±3.8</sup> | 0.7 <sup>±0.6</sup>       | 8.2 <sup>±1.8</sup>  |
| Real2Gen (ours)                            | 41.3 <sup>±4.5</sup>   | 46.3 <sup>±6.4</sup> | 25.0 <sup>±1.0</sup>      | 37.5 <sup>±3.0</sup> |

- Real2Gen shows robustness over DITTO

### Ablation Study

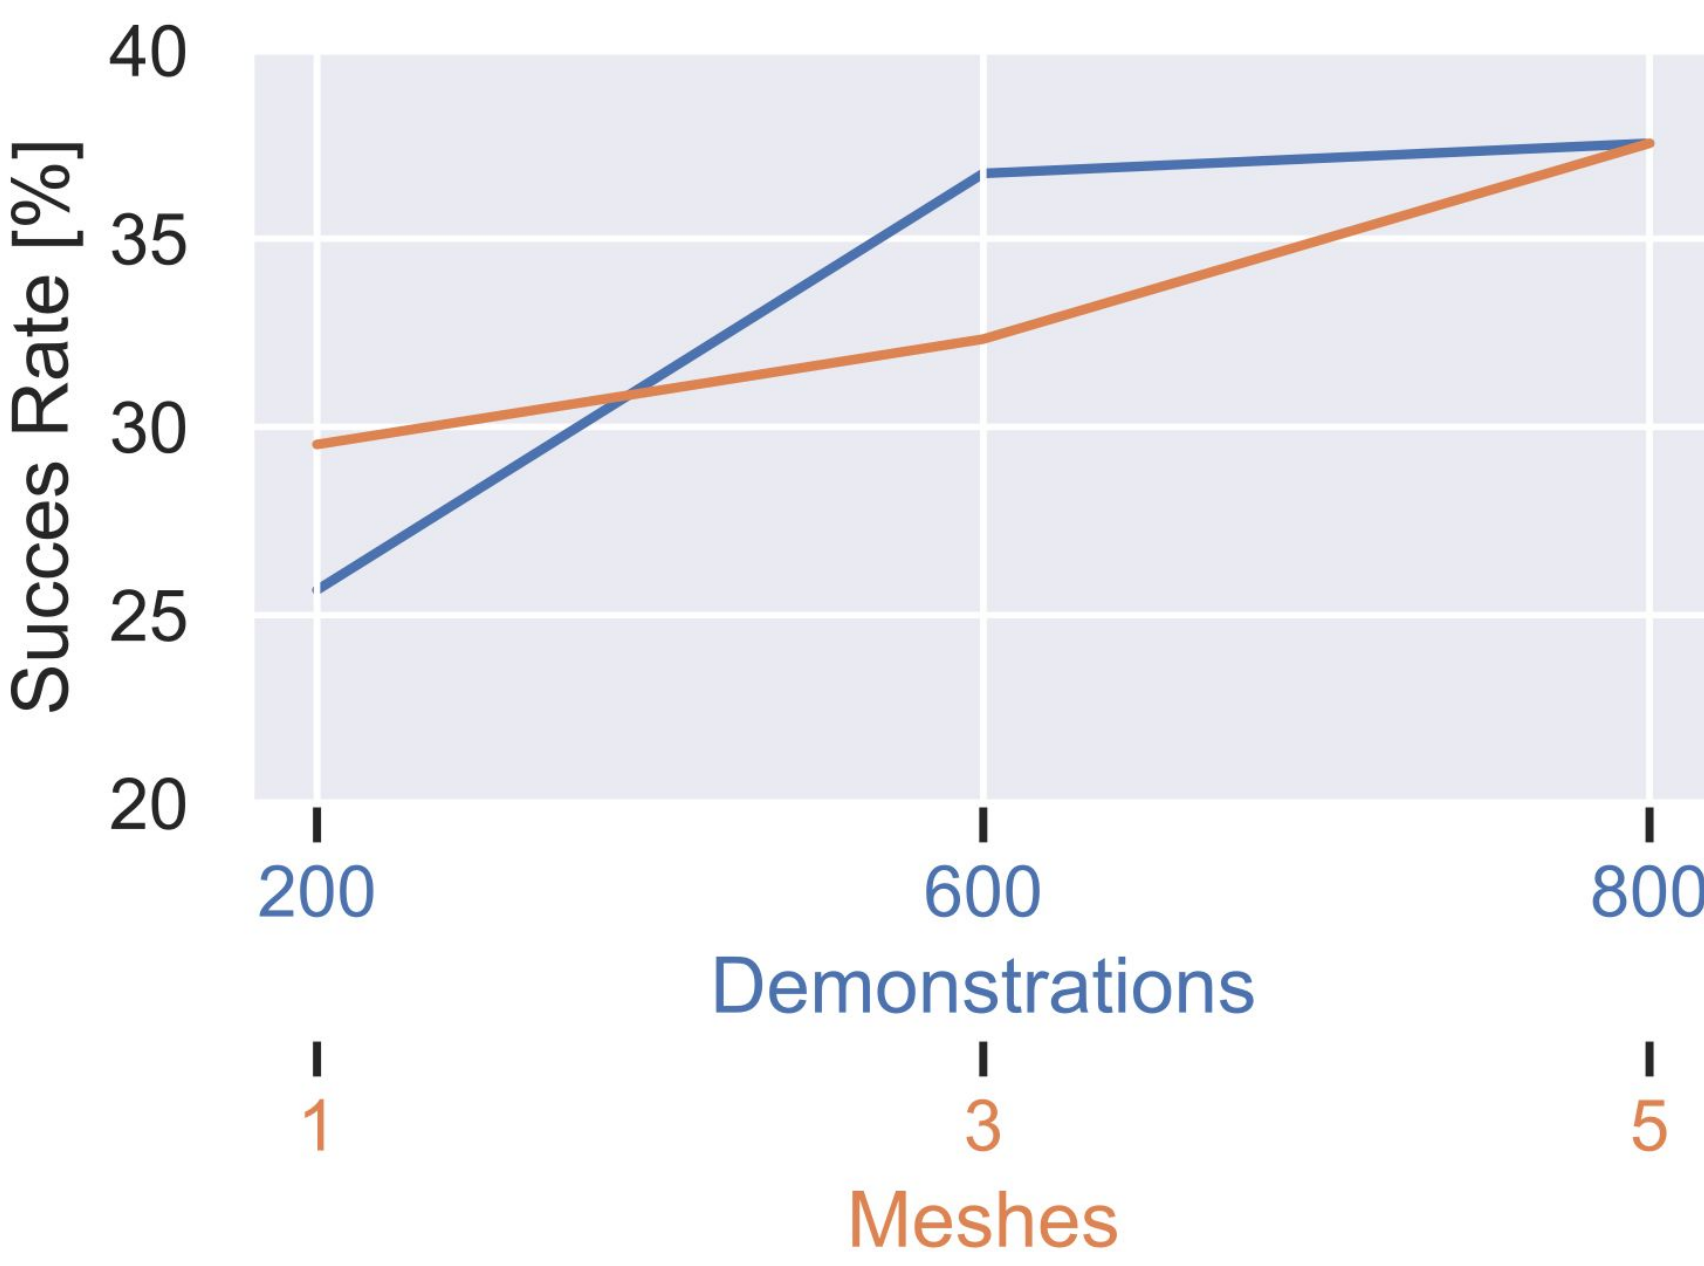

- Performance gain diminishes with more demonstrations
- Mesh amount are more relevant

**Acknowledgement:** This work was funded by the Carl Zeiss Foundation with the ReScaLe project. Nick Heppert is supported by the Konrad Zuse School of Excellence in Learning and Intelligent Systems (ELIZA) through the DAAD programme Konrad Zuse Schools of Excellence in Artificial Intelligence, sponsored by the Federal Ministry of Education and Research.

## Experiment – Mesh Generation

- Compare human effort for mesh retrieval against querying a database using tags
- Apply matching and manually verify
- Real2Gen provides almost 3x more available meshes

| Mesh Source                   | Available Meshes | 100 Mesh Pre-Selection | Matching Successful and Task Relevant |
|-------------------------------|------------------|------------------------|---------------------------------------|
| Point-E <sup>[3]</sup> (ours) | ∞                | Random                 | <b>54%</b>                            |
| Objaverse <sup>[6]</sup>      | 690              | Most viewed*           | 19%                                   |
|                               |                  | Random*                | 18%                                   |

*\*if less than a 100 meshes are available we use all*

## References

- [1] N. Heppert, M. Argus, T. Welschehold, T. Brox, and A. Valada, "Ditto: Demonstration imitation by trajectory transformation," in Proc. IEEE Int. Conf. on Intel. Rob. and Syst. IEEE, 2024, pp. 7565–7572.
- [2] Y. Zhu, A. Lim, P. Stone, and Y. Zhu, "Vision-based manipulation from single human video with open-world object graphs," arXiv preprint arXiv:2405.20321, 2024.
- [3] A. Nichol, H. Jun, P. Dhariwal, P. Mishkin, and M. Chen, "Point-e: A system for generating 3d point clouds from complex prompts," arXiv preprint arXiv:2212.08751, 2022.
- [4] W. Goodwin, S. Vaze, I. Havoutis, and I. Posner, "Zero-shot category-level object pose estimation," in Proc. Springer Eur. Conf. Comput. Vis. Springer, 2022, pp. 516–532.
- [5] E. Chisari, N. Heppert, M. Argus, T. Welschehold, T. Brox, and A. Valada, "Learning robotic manipulation policies from point clouds with conditional flow matching," Proc. Conf. on Rob. Learn., 2024.
- [6] M. Deitke, D. Schwenk, J. Salvador, L. Weihs, O. Michel, E. VanderBilt, L. Schmidt, K. Ehsani, A. Kembhavi, and A. Farhadi, "Objaverse: A universe of annotated 3d objects," in Proc. IEEE Conf. Comput. Vis. Pattern Recog., 2023, pp. 13 142–13 153.
